# Supplementary material for: Groundwater–surface water interactions across an arid river basin: spatial patterns revealed by stable isotopes and hydrochemistry
Source: Copernicus journal article supplement (doi:10.5194/hess-29-4417-2025), 2025-09-16
Supplement: Supplementary file 1 [file TableS1.xlsx]

## Sheet: Groundwater
No.	Location	Type	Latitude (N)	Longitude (E)	Elevation	Depth	Temperature	pH	TDS	Ca2+	K+	Mg2+	Na+	Cl-	HCO3-	SO42-	NO3-	SiO2	δD	δ18O	d-excess
			(°)	(°)	(m asl)	(m)	(℃)	(–)	(mg/L)	(mg/L)	(mg/L)	(mg/L)	(mg/L)	(mg/L)	(mg/L)	(mg/L)	(mg/L)	(mg/L)	(‰)	(‰)	(‰)
SL83-27	Suli	Spring	38.45	98.3	3780			8.1	308	52.8	1.9	9.1	16.8	8.9	166.5	52.1	4.2		-51.6	-8.4	15.6	(Xie et al., 2022)
GW20-01	Suli	Well	38.5	98.3	3794			/	/	/	/	/	/	/	/	/	/		-54.3	-9	17.7	(Xie et al., 2022)
GW18-23	Suli	Spring	38.5	98.3	3780			8.1	326.4	56.8	1.6	9.6	16.7	10.4	176.5	54.8	4.5		-52.7	-8.4	14.5	(Xie et al., 2022)
SL81-18	Suli	Spring	38.6	98.1	3734			7.9	379.2	61.9	3.2	9.9	36.4	45.8	127.7	94.3	4.7		-57.2	-8.4	10	(Xie et al., 2022)
GW20-02	Suli	Spring	38.7	98	3715			/	/	/	/	/	/	/	/	/	/		-57	-9.4	18.2	(Xie et al., 2022)
SL81-17	Suli	Spring	38.7	98	3681			/	/	/	/	/	/	/	/	/	/		-54.3	-8.8	16.1	(Xie et al., 2022)
SL83-7	Suli	Well	38.7	98.02	3646			8.2	304	46.3	1.3	26	5.9	10.1	81.6	132.8	4.3		-59.1	-9.7	18.5	(Xie et al., 2022)
SL81-11	Suli	Spring	38.8	97.7	3433			7.9	593.8	83.4	2.3	42.3	22.8	27.6	168.1	247.4	0.8		-60.4	-9.6	16.4	(Xie et al., 2022)
GW-2	Suli	Spring	38.8	97.7	3429			7.1	894.3	148.9	2.1	44.8	28.5	25.7	387.8	256.7	1.5		-59.5	-9.6	17.3	(Xie et al., 2022)
SL83-11	Suli	Spring	38.82	97.73	3411			7.8	977.9	161	2.5	46.9	20.2	27.4	459.4	260.5	1.6		-59.1	-9.5	16.9	(Xie et al., 2022)
GW20-03	Suli	Well	38.8	97.7	3405			/	/	/	/	/	/	/	/	/	/		-60.2	-9.8	18.2	(Xie et al., 2022)
GW-3	Changma	Well	39.9	96.8	2019			7.4	578.6	54.7	1.9	48.7	29.6	24.6	322.6	96.6	6.8		-72.1	-11	15.9	(Xie et al., 2022)
SL81-22	Changma	Spring	39.8	96.6	2248			8.1	403.1	42	1.7	31	19.1	20.3	218	71.1	2.4		-77.7	-11.6	15.1	(Xie et al., 2022)
SL81-25	Changma	Spring	39.5	96.9	2442			8.1	407.5	58	1	30.1	5.4	9.7	203.9	99.4	2.2		-64.8	-10.1	16	(Xie et al., 2022)
GZ04	Changma	Spring					3.7	7.88	281	38.7	2.07	30.7	17.9	29.37	208.7	74.6	1.31		-78.26	-11.89	16.86	(Wang et al., 2015)
GZ05	Changma	Spring					5.7	7.91	243	35.8	1.42	28.5	12.4	14.36	221.6	47.47	0.61		-78.02	-12.12	18.94	(Wang et al., 2015)
GZ06	Changma	Spring					7.5	8.09	235	40.3	1.72	28.7	9.58	9.96	194.2	90.58	0.78		-66.14	-10.38	16.9	(Wang et al., 2015)
GW-4	Yumen	Well	40.3	97	1486			7.4	270.8	27.3	1.2	18.5	21.2	22.3	124.8	55.5	1.5		-60.6	-9.5	15.4	(Xie et al., 2022)
GW-7	Yumen	Well	40.3	97.1	1457			7.7	967.5	82.2	5.1	80.5	82.1	92.9	370.3	254.3	31.7		-59.9	-9.3	14.5	(Xie et al., 2022)
GW-6	Yumen	Well	40.3	97.2	1456			7.6	757.5	69.2	3.7	55.6	65.7	63.8	291.2	208.2	7.4		-63.5	-9.8	14.9	(Xie et al., 2022)
GW-5	Yumen	Well	40.4	97.1	1430			7.4	850	84.3	4.6	67.4	52.4	55	358.1	228.2	2.4		-60.4	-9.5	15.6	(Xie et al., 2022)
GZ08	Yumen	Well					9.1	7.66	484	45	5.4	59.1	57.07	88.9	232.01	192.11	0.34		-59	-9.5	17	(Wang et al., 2015)
GZ09	Yumen	Spring					12.6	8.25	290	30.6	2.49	29.7	32.6	43.28	175.7	91.95	0.99		-61	-9.9	18.2	(Wang et al., 2015)
GZ10	Yumen	Well					11.5	8.11	472	50.7	2.88	46.6	48.3	86.04	164.8	177.99	0.8		-61	-9.9	18.2	(Wang et al., 2015)
GZ11	Yumen	Well					9.6	8.05	384	43.3	2.56	44.1	41.2	47.01	223.6	132.94	1.89		-64	-10.5	20	(Wang et al., 2015)
GZ12	Yumen	Well					11.6	7.76	298	34.2	2.24	31.6	28.6	39.55	197.7	89.41	0.84		-61	-10	19	(Wang et al., 2015)
GZ13	Yumen	Well					10.1	8.04	474	41.1	5.2	53.9	54.2	77.48	225.2	185.52	0.65		-59	-9.4	16.2	(Wang et al., 2015)
GZ14	Yumen	Well					10.4	7.47	498	71.49	4.09	70.59	65.25	69.58	405.02	132.06	3.88		-58	-8.7	11.6	(Wang et al., 2015)
GZ15	Yumen	Well					11.1	7.53	503.5	53.41	3.74	55.08	63.86	62.59	361.2	74.43	3.52		-60	-8.6	8.8	(Wang et al., 2015)
GZ16	Yumen	Well					10.5	7.56	452	47.65	3.68	38.39	58.66	54.93	328.49	71.06	1.26		-65	-9.9	14.2	(Wang et al., 2015)
GZ17	Yumen	Well					10.8	7.63	411	42.22	3.12	39.18	54.24	63.91	264.08	64.05	1.31		-64	-9.8	14.4	(Wang et al., 2015)
GZ18	Yumen	Well					10.7	7.34	555	63.86	3.54	58.44	57.74	62.39	414.94	80.6	4.11		-58	-9.1	14.8	(Wang et al., 2015)
GZ19	Yumen	Well					8.6	7.55	397	45.84	3.87	50.69	31.11	36.59	397.14	45.99	<0.03		-63	-9	9	(Wang et al., 2015)
GZ20	Yumen	Well					11.5	7.74	353	38.2	2.25	43.74	37.47	50.02	311.2	55.64	<0.03		-64	-9.6	12.8	(Wang et al., 2015)
1East	Yumen	Well				50	11.4	7.25	440	50.3	2.6	20.6	43.7	44.6	120	163	16.9		-60.1	-9.1	12.7	(He et al., 2015)
2East	Yumen	Well				75	10.1	6.94	644	75.8	3.7	31.1	61.6	65.4	114	300.2	13.1		-61.3	-9.4	13.9	(He et al., 2015)
3East	Yumen	Well				84	11	7.03	598	73.4	3.4	26.4	55.4	53.6	70	309	11.1		-61.5	-9.1	11.3	(He et al., 2015)
4East	Yumen	Well				9	4.4	7.83	659	40.5	4.3	10.8	165.6	112.8	130	290.1	3.2		-68	-9.8	10.4	(He et al., 2015)
5East	Yumen	Well				70	5.2	6.84	555	64.7	5.2	31	59.9	51.8	157	257.5	2.6		-61.5	-9.8	16.9	(He et al., 2015)
6East	Yumen	Well				5	16	7.5	1117	77.3	19.5	51.1	139.4	114	189	490	4.5		-57.1	-9.1	15.7	(He et al., 2015)
7East	Yumen	Well				80	17.9	7.65	484	56.3	2.5	16.4	58.3	50.6	167	158.7	9.6		-61.6	-9.7	16	(He et al., 2015)
8East	Yumen	Well				70	23.5	7.53	862	85.3	4.1	34	92.9	125	109	346	12.9		-59.1	-9.4	16.1	(He et al., 2015)
9East	Yumen	Well				70	11.9	7.7	520	66.7	3.2	25.8	48.9	52.2	177	190.1	15.4		-59.8	-9.2	13.8	(He et al., 2015)
16East	Yumen	Well				70	14	7.73	407	50.4	2.7	15.5	39.7	51	57	182	4.3		-60.3	-9.5	15.7	(He et al., 2015)
10Middle	Yumen	Well				50	12.7	8.23	265	31.2	2.4	10.3	25.5	31.8	70	93.6	2.3		-60	-9.3	14.4	(He et al., 2015)
11Middle	Yumen	Well				65	13.2	8.1	296	30.6	1.9	9.2	21.4	30	64	81.9	2.5		-57.6	-9.3	16.8	(He et al., 2015)
12Middle	Yumen	Well				50	12.8	7.43	993	128.5	13.8	71.8	178.8	280.3	56	681.6	1.2		-53.8	-8.3	12.6	(He et al., 2015)
13Middle	Yumen	Well				60	13.6	8.29	380	50.9	2.6	15	43.8	54.9	50	169.8	3.8		-57.6	-8.8	12.8	(He et al., 2015)
14Middle	Yumen	Well				60	11	8.07	431	47.3	2.7	16.9	53.5	62.6	50	207.2	1.9		-62.4	-9.7	15.2	(He et al., 2015)
15Middle	Yumen	Well				80	12.6	8	304	42.2	2	11.7	27.2	37.5	89	102.9	6.5		-61.4	-9.4	13.8	(He et al., 2015)
20Middle	Yumen	Well				100	13.4	8.02	255	29.6	2.2	9.9	26.1	27.9	91	74.5	2.1		-64.5	-10	15.5	(He et al., 2015)
22Middle	Yumen	Well				20	13	8.17	274	31.7	2.5	10.2	29.1	32.6	78	92.1	2.3		-62.7	-9.8	15.7	(He et al., 2015)
GW-15	Guazhou	Well			1245			8	1492.6	113.5	9.2	115.4	157.3	169.6	435.6	491.9	10		-53.7	-7.9	9.5	(Xie et al., 2022)
GW-18	Guazhou	Well			1176			8	1720.3	120.2	12.9	140	184.6	188.8	482.8	591	28.1		-54.1	-8	9.9	(Xie et al., 2022)
GW-17	Guazhou	Well			1176			8	894.3	76.6	4.8	64.8	86.6	85	301.6	275	1.5		-56.1	-8.2	9.5	(Xie et al., 2022)
GW-23	Guazhou	Well			1149			8	7142.4	461	36.4	466.6	1093	899.1	640.6	3545.6	37.1		-52.8	-7.6	8	(Xie et al., 2022)
23Middle	Guazhou	Well				50	13.2	6.92	1337	114.7	9.2	54.7	224.1	267	76	665.7	18.4		-55.3	-8.4	11.9	(He et al., 2015)
24Middle	Guazhou	Well				70	14.8	7.28	2560	216.5	17.9	114.1	444	545.5	67	1349.2	22.4		-54.1	-7.7	7.5	(He et al., 2015)
25Middle	Guazhou	Well				40	15.3	7.64	1312	131.6	9.7	42.3	273	290.4	56	745.4	6.2		-59.3	-8.7	10.3	(He et al., 2015)
26Middle	Guazhou	Well				40	13.6	7.24	668	60	7	29.2	94.6	106.8	45	337.9	7.5		-53.6	-7.8	8.8	(He et al., 2015)
27West	Guazhou	Well				60	14.5	7.26	2230	153.6	27.3	48	560.6	510.3	124	1151	24.2		-66.6	-9.1	6.2	(He et al., 2015)
35East	Guazhou	Well				100	12.5	8.07	928	100.6	6.6	39.2	139.3	154.3	136	464	5.2		-53.1	-8	10.9	(He et al., 2015)
36East	Guazhou	Well				120	12.5	7.99	696	85.5	6.9	28.3	95	101.5	50	385.5	6		-52.5	-8.4	14.7	(He et al., 2015)
28Middle	Guazhou	Well				120	13.7	7.72	1277	130.8	4.5	8.5	319.1	404.1	55	562	14.1		-65.6	-9.4	9.6	(He et al., 2015)
33Middle	Guazhou	Well				120	13.9	7.31	524	35.8	5.3	14.4	105	80.7	123	209.1	2		-60.3	-8.9	10.9	(He et al., 2015)
34Middle	Guazhou	Well				200	14.6	7.85	757	67.5	6.8	25.5	144.8	131.1	45	361.1	1.7		-61	-9.5	15	(He et al., 2015)
29West	Guazhou	Well				120	17.3	7.69	919	73.2	3.2	18.6	199.8	167	78	437.1	12.2		-69.5	-9.7	8.1	(He et al., 2015)
30West	Guazhou	Well				90	15.2	7.56	1065	91.5	11.4	24.6	223	183.6	72	587.1	11.8		-70.9	-9.7	6.7	(He et al., 2015)
31West	Guazhou	Well				81	14.6	7.74	1050	89.4	10.5	24.5	220.8	179.4	70	571.9	10.1		-71	-9.5	5	(He et al., 2015)
32West	Guazhou	Well				90	14	7.81	1203	98.8	6.5	28	260.6	193	74	657.1	9.8		-70.7	-9.6	6.1	(He et al., 2015)
GZ01	Guazhou	Well				55	11	7.8	2240	132	3.7	166	213	359.5	368.6	792	7.7		-54	-7.9	9.2	(Wang et al., 2016)
GZ02	Guazhou	Well				30	12.5	8	2140	123	5.8	119	238	301.4	165.3	831.2	7.86		-53	-7.8	9.4	(Wang et al., 2016)
GZ03	Guazhou	Well				65	12	8.1	1160	64.9	2.6	84.9	146	247.1	170.4	408	4.69		-54	-7.8	8.4	(Wang et al., 2016)
GZ04	Guazhou	Well				55	12	7.8	1382	87.5	3.1	102	169	340.9	141.1	481	6.04		-54	-8	10	(Wang et al., 2016)
GZ05	Guazhou	Well				50	11.5	7.8	967	58.3	1.5	62.9	87.9	144.4	164.8	307.5	2.42		-55	-8.3	11.4	(Wang et al., 2016)
GZ06	Guazhou	Well				50	13	7.8	2980	171	7.9	126	324	658.6	92.3	803.5	11.75		-56	-8.1	8.8	(Wang et al., 2016)
GZ07	Guazhou	Well				40	12	7.9	2760	155	5.8	116	326	603.1	106.5	787.2	7.5		-57	-9.2	16.6	(Wang et al., 2016)
GZ08	Guazhou	Well				80	13	7.9	2110	117	4.4	120	244	334.3	125	872.6	3.49		-57	-9.2	16.6	(Wang et al., 2016)
GZ09	Guazhou	Well				40	13	7.8	1572	74.5	3.6	60.2	187	304	87.9	421.4	2.3		-61	-8.1	3.8	(Wang et al., 2016)
GZ10	Guazhou	Well				80	12.1	7.5	1541	91.7	9.2	121.1	256.5	397.4	389.5	295.2	2.42		-51	-7.6	9.8	(Wang et al., 2016)
GZ11	Guazhou	Well				45	12	7.4	1973	133.3	10.5	170.1	253.6	449.8	487.8	430.3	2.45		-54	-8.1	10.8	(Wang et al., 2016)
GZ12	Guazhou	Well				65	12.3	7.5	1439	85.1	8.7	116.5	222.3	338.4	405.1	275.3	1.57		-56	-8.4	11.2	(Wang et al., 2016)
GZ13	Guazhou	Well				40	12.7	7.6	952	55	7.2	82	126.3	111.7	482.9	146.4	2.07		-55	-8.1	9.8	(Wang et al., 2016)
GZ14	Guazhou	Well				65	12.2	7.4	1202	75.7	9.4	102.6	160.5	189.2	522.7	201.4	4.28		-53	-7.6	7.8	(Wang et al., 2016)
GZ15	Guazhou	Well				35	13.5	7.1	3130	204	21.8	250	402	420.7	567.5	1131.3	9.62		/	/	/	(Wang et al., 2016)
GZ16	Guazhou	Well				65	13	7.3	1860	116	15.8	127	212	162.8	442.7	563.6	4.35		/	/	/	(Wang et al., 2016)
GZ17	Guazhou	Well				25	13	7.6	1114	74.8	4.6	22	264	301.2	73.2	403	6.55		/	/	/	(Wang et al., 2016)
GZ18	Guazhou	Well				25	12.5	7.5	996	71.7	5.5	22.8	226	278.9	97.6	363.1	6.16		/	/	/	(Wang et al., 2016)
GZ19	Guazhou	Well				20	12	7.7	991	67.1	4.5	22.7	253	316.5	72.5	380.2	5.72		/	/	/	(Wang et al., 2016)
GZ20	Guazhou	Well				20	12	7.8	1146	76.1	4.9	23	269	308.6	97.6	433.9	5.75		/	/	/	(Wang et al., 2016)
GZ21	Guazhou	Well				20	11.6	7.7	1418	84.7	4.8	23.3	273	390.2	27.6	406.6	5.85		/	/	/	(Wang et al., 2016)
GZ22	Guazhou	Well				20	11	7.5	1323	92.7	7.3	32.5	297	367.8	92.5	405.6	5.96		/	/	/	(Wang et al., 2016)
GZ23	Guazhou	Well				15	11.5	7.3	1395	93.7	6.3	33.3	356	410.1	97.6	557.5	6.32		/	/	/	(Wang et al., 2016)
GZ24	Guazhou	Well				20	12	7.7	932	79	3.4	30.7	186	288.4	27.6	366.3	5.83		/	/	/	(Wang et al., 2016)
GZ25	Guazhou	Well				35	12	7.7	1311	104.8	4.9	36.7	279	355.4	97.6	498.4	6.8		/	/	/	(Wang et al., 2016)
GZ26	Guazhou	Well				45	13.5	8	492	36.4	0.9	36	49.3	65.9	107.4	178.1	0.72		/	/	/	(Wang et al., 2016)
GZ27	Guazhou	Well				30	12	8	449	37.9	0.7	46.8	39.4	60.3	117.2	185.6	0.88		-53	-8	11	(Wang et al., 2016)
GZ28	Guazhou	Well				35	13	7.9	1071	61.6	4.9	40.4	199	264.5	112.3	359.2	5.5		/	/	/	(Wang et al., 2016)
GZ29	Guazhou	Well				15	12.5	7.7	1652	134	6.4	40.2	360	455.1	170.9	573.4	6.71		/	/	/	(Wang et al., 2016)
He, J., Ma, J., Zhao, W., and Sun, S.: Groundwater evolution and recharge determination of the Quaternary aquifer in the Shule River basin, Northwest China, Hydrogeology Journal, 23, 1745–1759, 10.1007/s10040-015-1311-9, 2015. Wang, L., Li, G., Dong, Y., Han, D., and Zhang, J.: Using hydrochemical and isotopic data to determine sources of recharge and groundwater evolution in an arid region: a ca…
