# Supplementary material for: Groundwater–surface water interactions across an arid river basin: spatial patterns revealed by stable isotopes and hydrochemistry
Source: Copernicus journal article supplement (doi:10.5194/hess-29-4417-2025), 2025-09-16
Supplement: Supplementary file [file hess-29-4417-2025-supplement-title-page.pdf › hess-29-4417-2025-supplement-title-page.pdf]

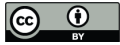

*Supplement of*

**Groundwater–surface water interactions across an arid river basin: spatial patterns revealed by stable isotopes and hydrochemistry**

**Liheng Wang et al.**

*Correspondence to:* Yanhui Dong (dongyh@mail.iggcas.ac.cn)

- hess-29-4417-2025-supplement-title-page.pdf
- TableS1.xlsx

The copyright of individual parts of the supplement might differ from the article licence.
